# Supplementary material
Source: publisher site journal article supplement (https://www.dovepress.com/article/469052)
Supplement: Supplementary file 1 [file get_supplementary_file.php]

**Appendix 1**  
**Sensitivity analysis**

| Variables                                                                               | Logistic<br>Reg. with<br>imputed<br>data<br>P-value | Logistic.<br>Reg.<br>without<br>imputed<br>data<br>P-value |
|-----------------------------------------------------------------------------------------|-----------------------------------------------------|------------------------------------------------------------|
| Sex (male vs. female)                                                                   | 0.063                                               | 0.518                                                      |
| Type of profession (ref group: Physician)                                               |                                                     |                                                            |
| Nurse practitioner                                                                      | <b>&lt;0.001</b>                                    | 0.064                                                      |
| Pharmacist                                                                              | <b>&lt;0.001</b>                                    | <b>&lt;0.001</b>                                           |
| Years of experience (0-10 years vs. 11+ years)                                          | <b>&lt;0.001</b>                                    | <b>&lt;0.001</b>                                           |
| Type of practice (vs. primary care clinic)                                              |                                                     |                                                            |
| Hospital & emergency room                                                               | <b>&lt;0.016</b>                                    | 0.061                                                      |
| Community pharmacy                                                                      | <b>&lt;0.001</b>                                    | 0.331                                                      |
| Pain clinic and other <sup>a</sup>                                                      | <b>&lt;0.001</b>                                    | 0.379                                                      |
| Region (remote <sup>b</sup> vs. non-remote)                                             | 0.213                                               | 0.663                                                      |
| Living with chronic pain                                                                | <b>0.033</b>                                        | 0.462                                                      |
| Having a relative living with chronic pain                                              | <b>0.024</b>                                        | 0.578                                                      |
| Percentage of time spent on educational activities about the management of chronic pain | <b>&lt;0.001</b>                                    | <b>&lt;0.001</b>                                           |
| Perception of the risks associated with short-acting opioids                            | 0.049                                               | 0.428                                                      |
| Perception of the risks associated with long-acting opioids                             | 0.060                                               | 0.281                                                      |

For imputed data N=207, for analysis without imputation N=194.

level of significance was set at 95% with P value < 0.05 as statistically significant. Statistically significant p values are shown in bold.

The dependent variable was comfort level, which was coded as a dichotomous variable (Two groups, scores 0-6 = 117 participants and scores 7-10 = 90 participants).

Variance inflation factor was <10 and tolerance was > 0.1.

<sup>a</sup> Other settings included local community service centers, long-term care residences, outpatient clinics, rehabilitation centers, operating rooms, palliative care, and telemedicine.

<sup>b</sup> Remote resource regions as defined by Revenu Quebec (i.e., the provincial revenue agency): Bas-Saint-Laurent, Saguenay-Lac-Saint-Jean, Abitibi-Témiscamingue, Côte-Nord, Nord-du-Québec, and Gaspésie-Îles-de-la-Madeleine. Non-remote regions are located near major urban centers.
